# Supplementary material
Source: Springer Nature journal article supplement (https://www.springermedizin.de/resource/supplementary/12913_2009_1084_MOESM1_ESM.pdf/9536308)

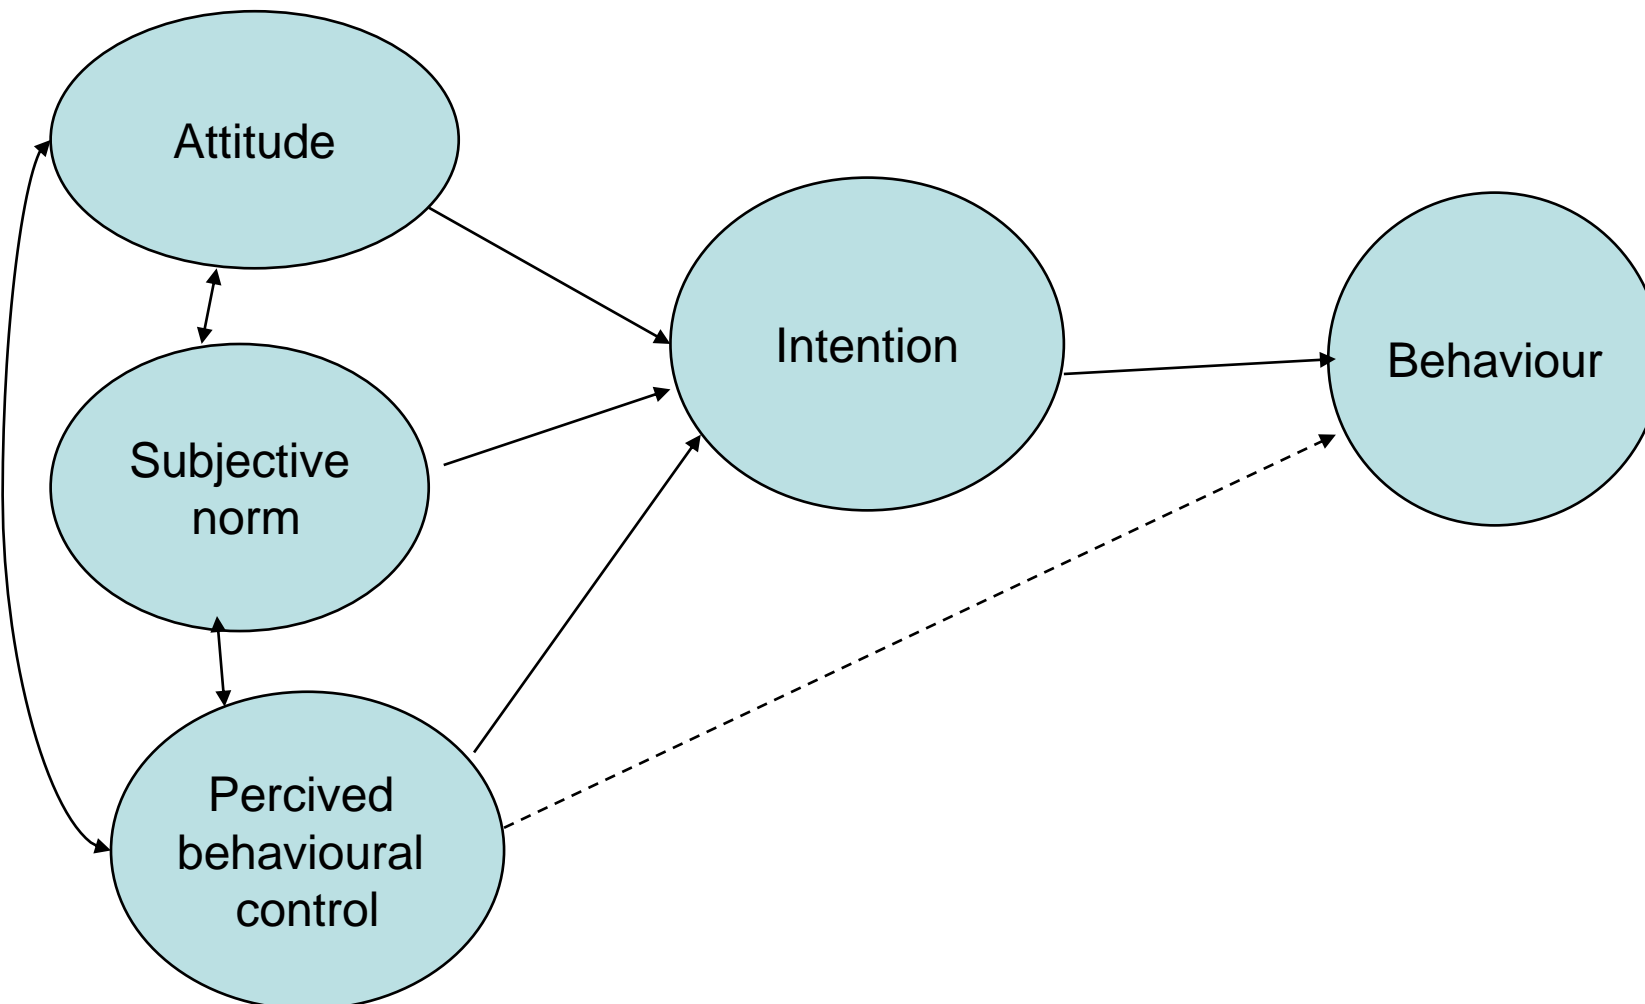

Supplement: MOESM1 [file 9536308]
